# Supplementary material for: High resolution estimates of relative gene abundance with quantitative ratiometric regression PCR (qRR-PCR)
Source: Royal Society of Chemistry journal article supplement (doi:10.1039/d1an01397a), 2021-01-01
Supplement: d1an01397a1.pdf [file d1an01397a1.pdf]

## Supplementary Material

**Title:** High resolution estimates of relative gene abundance with quantitative ratiometric regression PCR (qRR-PCR)

**Authors:** Alexander Y. Trick<sup>1\*</sup>, Fan-En Chen<sup>1\*</sup>, Justin A. Schares<sup>2</sup>, Blake E. Freml<sup>2</sup>, Pa Lor<sup>2</sup>, Yue Yun<sup>2</sup>, and Tza-Huei Wang<sup>1,3,4</sup>

\*co-first authors

<sup>1</sup>Department of Biomedical Engineering, Johns Hopkins University, Baltimore, MD 21218, USA

<sup>2</sup>Corteva Agriscience, Johnston, IA 50131, USA

<sup>3</sup>Institute for NanoBiotechnology, Johns Hopkins University, Baltimore, MD 21218, USA

<sup>4</sup>Institute for NanoBiotechnology, Johns Hopkins University, Baltimore, MD 21218, USA

**Table S1.** Residual sum squared (RSS) for univariate and bivariate fits

**Figure S1.** Univariate four parameter logistic fits

**Figure S2.** Standard curve failure rate at varying thresholds

**Figure S3.** Prediction error percentage versus VIC Ct

**Figure S4.** qRR-PCR model performance using smaller training sets

**Table S1.** Residual sum squared (RSS) for univariate and bivariate fits

Values along the diagonal represent RSS values for univariate logistic fits while all other values represent RSS values for bivariate fits modeled from the logistic fits for the corresponding cycle “x” and cycle “y”.

|         |    | Cycle y |        |        |        |        |        |        |        |         |         |         |
|---------|----|---------|--------|--------|--------|--------|--------|--------|--------|---------|---------|---------|
|         |    | 0       | 1      | 2      | 3      | 4      | 5      | 6      | 7      | 8       | 9       | 10      |
| Cycle x | 0  | 34341   |        |        |        |        |        |        |        |         |         |         |
|         | 1  | 9442    | 14646  |        |        |        |        |        |        |         |         |         |
|         | 2  | 5671    | 5556   | 8308   |        |        |        |        |        |         |         |         |
|         | 3  | 5309    | 5560   | 6075   | 6813   |        |        |        |        |         |         |         |
|         | 4  | 5644    | 5938   | 6222   | 6311   | 6690   |        |        |        |         |         |         |
|         | 5  | 5967    | 6197   | 6410   | 6439   | 6417   | 6762   |        |        |         |         |         |
|         | 6  | 6812    | 6850   | 6975   | 7040   | 7049   | 7063   | 7680   |        |         |         |         |
|         | 7  | 9046    | 8745   | 8729   | 8880   | 9036   | 9154   | 9107   | 10611  |         |         |         |
|         | 8  | 273183  | 272874 | 274885 | 278612 | 283649 | 287826 | 289828 | 289380 | 299040  |         |         |
|         | 9  | 600758  | 622958 | 620285 | 627573 | 642616 | 653847 | 657567 | 657551 | 658368  | 689742  |         |
|         | 10 | 817713  | 828996 | 914228 | 895377 | 912971 | 935689 | 956006 | 980079 | 1002207 | 1028898 | 1103609 |

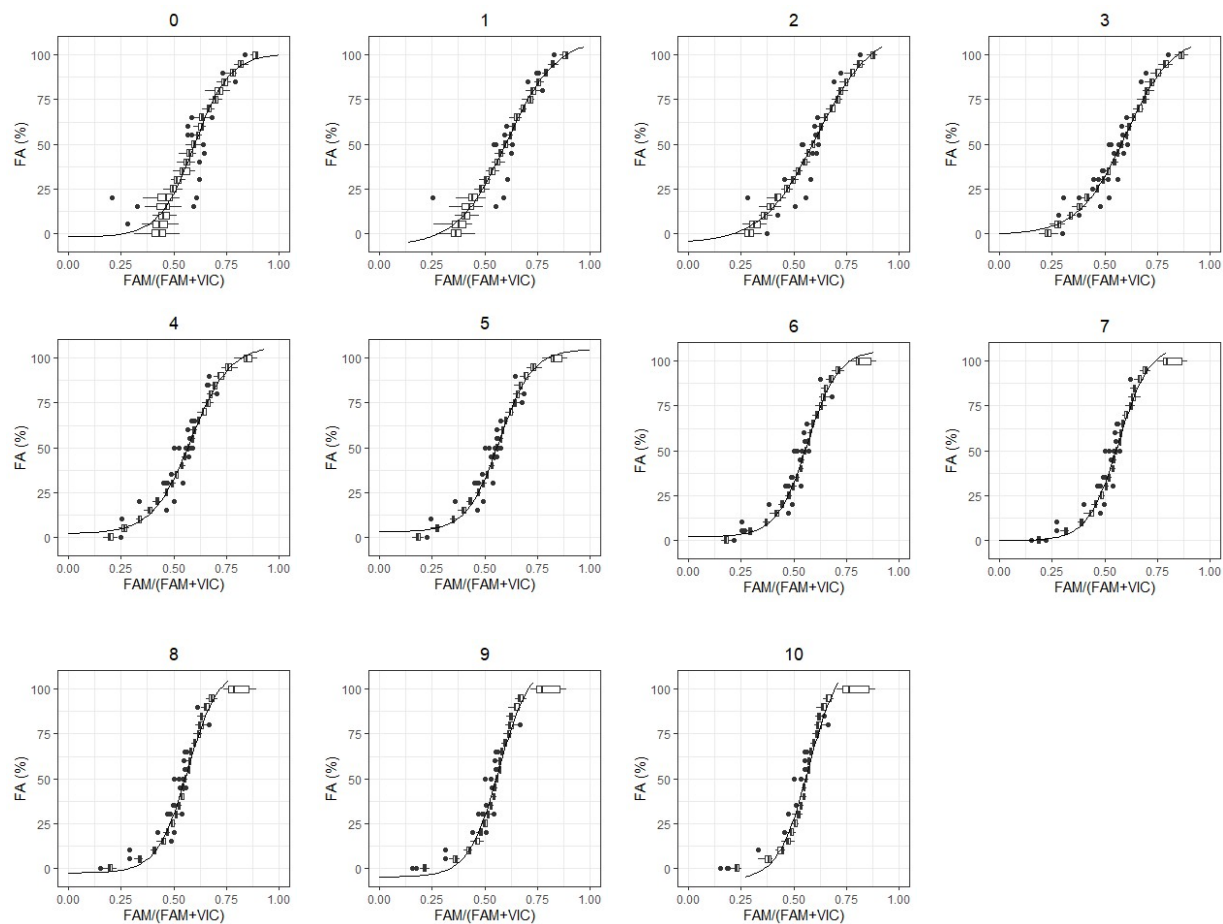

**Figure S1.** Univariate four parameter logistic fits. The number at the top of each plot represents the cycle after the VIC Ct from which the fluorescence ratio data was extracted for the fits.

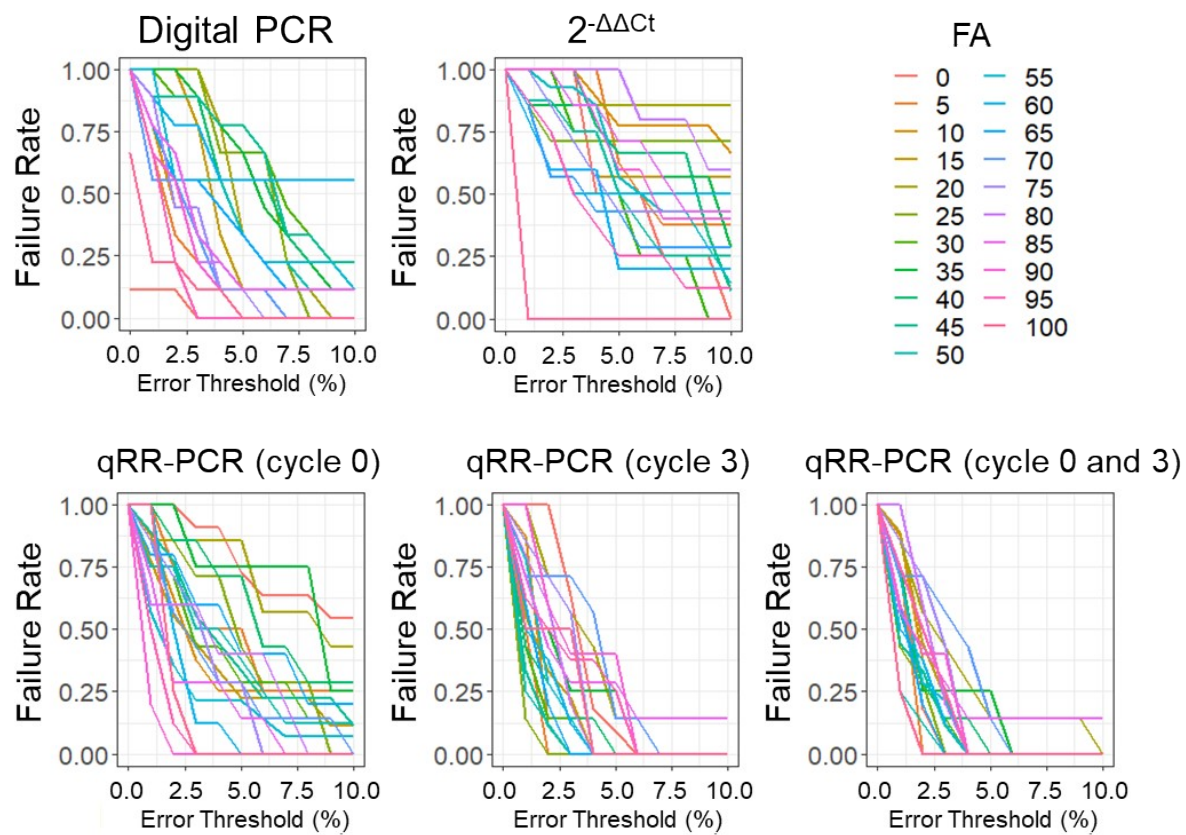

**Figure S2.** Standard curve failure rate at varying thresholds. Each line tracks the rate at which points in each FA data set that failed to fall within the given thresholds

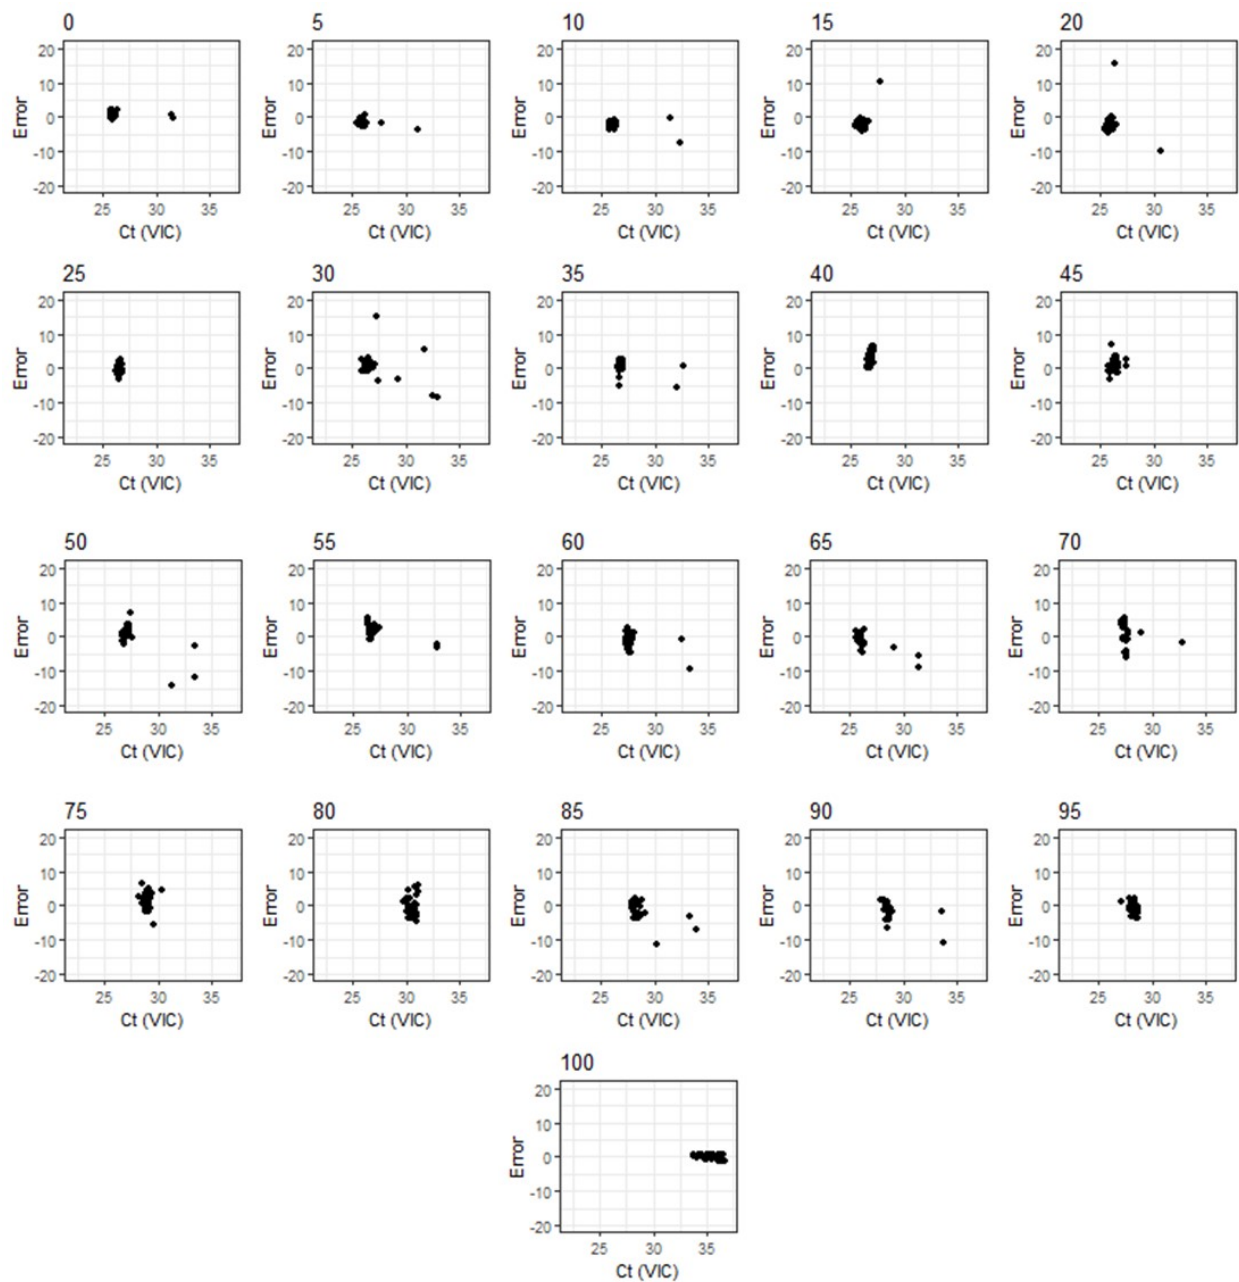

**Figure S3.** Prediction error percentage versus VIC Ct for each replicate with a given fractional abundance value shows clustering with approximately 2 cycles for Ct values without a clear correlation between Ct and error.

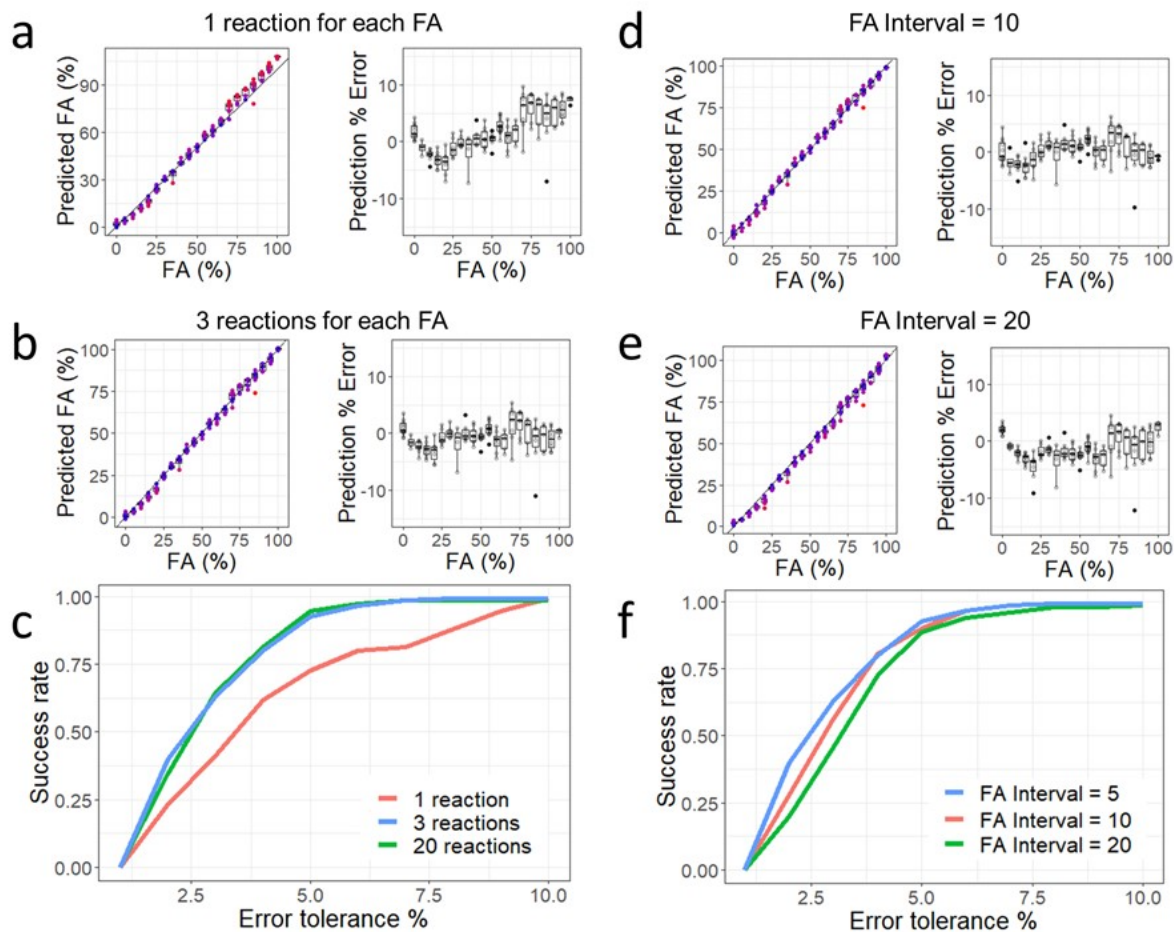

**Figure S4.** qRR-PCR model performance using smaller training sets. Prediction of FA was compared between using (a) only single point at each FA, and (b) 3 replicates at each FA as training set. (c) Success rate of the model trained with 3 replicates is comparable to the prediction model trained with ~20 replicates no matter the error tolerance is.

Instead of training the model with reactions containing varying FA in 5% increments from 0% to 100%, prediction of FA was compared between (d) reactions containing FA in 10% increments, and (e) reactions containing FA in 20% increments. (f) The model trained with FA in 5% increments shows higher success rates (92.7%) at 5% error tolerance, while the success rate of 10% increments is 90.1% and the success rate of 20% increments is 88.7%.
