# Supplementary material for: High resolution estimates of relative gene abundance with quantitative ratiometric regression PCR (qRR-PCR)
Source: Royal Society of Chemistry journal article supplement (doi:10.1039/d1an01397a), 2021-01-01
Supplement: d1an01397a2.xlsx [file d1an01397a2.xlsx]

## Sheet: Combined
	Plate #1		Plate #2		Plate #3		Plate #1							Plate #2							Plate #3							Total Statistics
Group Name	FAM Positive (copies/µL)	VIC Positive (copies/µL)	FAM Positive (copies/µL)	VIC Positive (copies/µL)	FAM Positive (copies/µL)	VIC Positive (copies/µL)	Sum FAM & VIC	% FAB FAM	%FAB VIC	Avg. FAM	Avg. VIC	Std.P FAM	Std.P VIC	Sum FAM & VIC	% FAB FAM	%FAB VIC	Avg. FAM	Avg. VIC	Std.P FAM	Std.P VIC	Sum FAM & VIC	% FAB FAM	%FAB VIC	Avg. FAM	Avg. VIC	Std.P FAM	Std.P VIC	Sum FAM	Sum VIC	Total	% FAB FAM	% FAB VIC	Avg. FAB FAM	Avg. FAB VIC	Std.P FAM	Std.P VIC
0% Grind 1	0	21	0	151	2.1	75	21	0	1	0	1	0	0	151	0	1	0	1	0	0	77.1	0.0272374	0.972763	0.00907912	0.990921	0.0128398	0.0128398	2.1	2274	2276.1	0.000922631	0.999077	0.00302637	0.996974	0.00855987	0.00855987
0% Grind 2	0	423	0	114	0	337	423	0	1					114	0	1					337	0	1
0% Grind 3	0	371	0	214	0	568	371	0	1					214	0	1					568	0	1
10% Grind 1	22	249	2.6	23	22	224	271	0.0811808	0.918819	0.0707728	0.929227	0.0073791	0.0073791	25.6	0.101562	0.898438	0.153654	0.846346	0.0722427	0.0722427	246	0.0894309	0.910569	0.0800235	0.919976	0.0114054	0.0114054	172.7	2095.2	2267.9	0.0761497	0.92385	0.101483	0.898517	0.0563589	0.0563589
10% Grind 2	37	533	26	225	13	137	570	0.0649123	0.935088					251	0.103586	0.896414					150	0.0866667	0.913333
10% Grind 3	30	423	1.1	3.2	19	278	453	0.0662252	0.933775					4.3	0.255814	0.744186					297	0.0639731	0.936027
100% Grind 1	965	0.5	525	23	909	3.7	965.5	0.999482	0.000517866	0.998813	0.00118697	0.00132936	0.00132936	548	0.958029	0.0419708	0.984439	0.0155615	0.0187731	0.0187731	912.7	0.995946	0.00405391	0.991591	0.0084095	0.00917675	0.00917675	5352	37.2	5389.2	0.993097	0.00690269	0.991614	0.00838597	0.0134378	0.0134378
100% Grind 2	445	0	564	0	245	5.3	445	1	0					564	1	0					250.3	0.978825	0.0211746
100% Grind 3	688	2.1	549	2.6	462	0	690.1	0.996957	0.00304304					551.6	0.995286	0.00471356					462	1	0
15% Grind 1	61	465	42	325	32	261	526	0.11597	0.88403	0.119462	0.880538	0.00560566	0.00560566	367	0.114441	0.885559	0.132917	0.867083	0.029405	0.029405	293	0.109215	0.890785	0.10659	0.89341	0.00912189	0.00912189	345.5	2599.8	2945.3	0.117306	0.882694	0.119656	0.880344	0.0210229	0.0210229
15% Grind 2	65	500	40	324	0.5	4.8	565	0.115044	0.884956					364	0.10989	0.89011					5.3	0.0943396	0.90566
15% Grind 3	47	322	15	71	43	327	369	0.127371	0.872629					86	0.174419	0.825581					370	0.116216	0.883784
20% Grind 1	153	853	12	89	86	441	1006	0.152087	0.847913	0.145982	0.854018	0.0142767	0.0142767	101	0.118812	0.881188	0.139204	0.860796	0.0148137	0.0148137	527	0.163188	0.836812	0.163478	0.836522	0.00342357	0.00342357	668	3670	4338	0.153988	0.846012	0.149555	0.850445	0.0157981	0.0157981
20% Grind 2	25	173	87	512	136	717	198	0.126263	0.873737					599	0.145242	0.854758					853	0.159437	0.840563
20% Grind 3	79	416	41	226	49	243	495	0.159596	0.840404					267	0.153558	0.846442					292	0.167808	0.832192
25% Grind 1	86	377	25	93	34	155	463	0.185745	0.814255	0.182264	0.817736	0.00513781	0.00513781	118	0.211864	0.788136	0.213273	0.786727	0.00140424	0.00140424	189	0.179894	0.820106	0.183411	0.816589	0.004181	0.004181	455	1931	2386	0.190696	0.809304	0.192983	0.807017	0.0148781	0.0148781
25% Grind 2	56	245	34	124	53	227	301	0.186047	0.813953					158	0.21519	0.78481					280	0.189286	0.810714
25% Grind 3	21	99	60	222	86	389	120	0.175	0.825					282	0.212766	0.787234					475	0.181053	0.818947
30% Grind 1	65	221	31	88	3.7	19	286	0.227273	0.772727	0.242893	0.757107	0.0288414	0.0288414	119	0.260504	0.739496	0.1662	0.8338	0.117877	0.117877	22.7	0.162996	0.837004	0.218035	0.781965	0.0398098	0.0398098	430.7	1431.8	1862.5	0.231248	0.768752	0.209042	0.790958	0.0803611	0.0803611
30% Grind 2	181	649	0	5.8	28	91	830	0.218072	0.781928					5.8	0	1					119	0.235294	0.764706
30% Grind 3	34	86	55	176	33	96	120	0.283333	0.716667					231	0.238095	0.761905					129	0.255814	0.744186
35% Grind 1	44	94	52	129	22	46	138	0.318841	0.681159	0.291504	0.708496	0.0219882	0.0219882	181	0.287293	0.712707	0.275536	0.724464	0.022202	0.022202	68	0.323529	0.676471	0.301716	0.698284	0.0201378	0.0201378	599	1493	2092	0.286329	0.713671	0.289586	0.710414	0.024015	0.024015
35% Grind 2	53	147	33	102	92	208	200	0.265	0.735					135	0.244444	0.755556					300	0.306667	0.693333
35% Grind 3	134	327	23	55	146	385	461	0.290672	0.709328					78	0.294872	0.705128					531	0.274953	0.725047
40% Grind 1	39	67	120	205	88	155	106	0.367925	0.632075	0.346075	0.653925	0.0218493	0.0218493	325	0.369231	0.630769	0.356266	0.643734	0.0373759	0.0373759	243	0.36214	0.63786	0.342205	0.657795	0.0142121	0.0142121	989	1936	2925	0.33812	0.66188	0.348445	0.651555	0.0275298	0.0275298
40% Grind 2			113	257	198	394								370	0.305405	0.694595					592	0.334459	0.665541
40% Grind 3	178	371	54	83	199	404	549	0.324226	0.675774					137	0.394161	0.605839					603	0.330017	0.669983
45% Grind 1	335	349	44	70	265	322	684	0.489766	0.510234	0.406836	0.593164	0.060769	0.060769	114	0.385965	0.614035	0.379675	0.620325	0.0114284	0.0114284	587	0.451448	0.548552	0.391731	0.608269	0.0482292	0.0482292	1561	2292	3853	0.405139	0.594861	0.392747	0.607253	0.0466189	0.0466189
45% Grind 2	258	488	243	381	29	58	746	0.345845	0.654155					624	0.389423	0.610577					87	0.333333	0.666667
45% Grind 3	209	334	64	112	114	178	543	0.384899	0.615101					176	0.363636	0.636364					292	0.390411	0.609589
5% Grind 1	0	5.8	0.5	38	9.5	170	5.8	0	1	0.0264273	0.973573	0.0214023	0.0214023	38.5	0.012987	0.987013	0.0315457	0.968454	0.0151531	0.0151531	179.5	0.0529248	0.947075	0.0405738	0.959426	0.00873377	0.00873377	70.6	1681.8	1752.4	0.0402876	0.959712	0.0328489	0.967151	0.0169957	0.0169957
5% Grind 2	5.3	192	10	307	14	394	197.3	0.0268626	0.973137					317	0.0315457	0.968454					408	0.0343137	0.965686
5% Grind 3	26	470	4.8	91	0.5	14	496	0.0524194	0.947581					95.8	0.0501044	0.949896					14.5	0.0344828	0.965517
50% Grind 1	528	496	245	263	6.4	11	1024	0.515625	0.484375	0.488923	0.511077	0.0253644	0.0253644	508	0.482283	0.517717	0.475863	0.524137	0.0218588	0.0218588	17.4	0.367816	0.632184	0.414911	0.585089	0.0348184	0.0348184	2118.4	2350	4468.4	0.474085	0.525915	0.459899	0.540101	0.0426403	0.0426403
50% Grind 2	202	205	215	216	124	151	407	0.496314	0.503686					431	0.49884	0.50116					275	0.450909	0.549091
50% Grind 3	292	350	221	274	285	384	642	0.454829	0.545171					495	0.446465	0.553535					669	0.426009	0.573991
55% Grind 1	883	781	405	306			1664	0.530649	0.469351	0.572463	0.427537	0.0528756	0.0528756	711	0.56962	0.43038	0.548806	0.451194	0.0284832	0.0284832	0			0.506714	0.493286	0.0124349	0.0124349	2424	2100	4524	0.535809	0.464191	0.547155	0.452845	0.045182	0.045182
55% Grind 2	170	145	308	234	122	113	315	0.539683	0.460317					542	0.568266	0.431734					235	0.519149	0.480851
55% Grind 3	22	12	298	288	216	221	34	0.647059	0.352941					586	0.508532	0.491468					437	0.494279	0.505721
60% Grind 1	391	281	522	340	31	87	672	0.581845	0.418155	0.581845	0.418155	0	0	862	0.605568	0.394432	0.583963	0.416037	0.0216051	0.0216051	118	0.262712	0.737288	0.412415	0.587585	0.149703	0.149703	1468	1116	2584	0.568111	0.431889	0.51492	0.48508	0.127109	0.127109
60% Grind 2														0							0
60% Grind 3	0	0	248	193	276	215								441	0.562358	0.437642					491	0.562118	0.437882
65% Grind 1			324	182	29	19				0.642913	0.357087	0.0237539	0.0237539	506	0.640316	0.359684	0.630257	0.369743	0.0236544	0.0236544	48	0.604167	0.395833	0.619765	0.380235	0.0348344	0.0348344	1762	1040	2802	0.628837	0.371163	0.629487	0.370513	0.0297767	0.0297767
65% Grind 2	52	26	457	243	163	81	78	0.666667	0.333333					700	0.652857	0.347143					244	0.668033	0.331967
65% Grind 3	265	163	199	134	273	192	428	0.619159	0.380841					333	0.597598	0.402402					465	0.587097	0.412903
70% Grind 1	81	31	334	165	497	240	112	0.723214	0.276786	0.708434	0.291566	0.0118082	0.0118082	499	0.669339	0.330661	0.664684	0.335316	0.024676	0.024676	737	0.674355	0.325645	0.681714	0.318286	0.0173215	0.0173215	2404	1139	3543	0.678521	0.321479	0.684944	0.315056	0.0259556	0.0259556
70% Grind 2	293	129	363	211	326	136	422	0.694313	0.305687					574	0.632404	0.367596					462	0.705628	0.294372
70% Grind 3	264	109	99	44	147	74	373	0.707775	0.292225					143	0.692308	0.307692					221	0.665158	0.334842
75% Grind 1	436	173	218	78	459	185	609	0.715928	0.284072	0.729376	0.270624	0.00964771	0.00964771	296	0.736486	0.263514	0.737916	0.262084	0.0341909	0.0341909	644	0.712733	0.287267	0.732583	0.267417	0.0145148	0.0145148	3304	1220	4524	0.730327	0.269673	0.733292	0.266708	0.0224351	0.0224351
75% Grind 2	372	132	216	94	756	256	504	0.738095	0.261905					310	0.696774	0.303226					1012	0.747036	0.252964
75% Grind 3	508	184	32	9	307	109	692	0.734104	0.265896					41	0.780488	0.219512					416	0.737981	0.262019
80% Grind 1	505	144	253	75			649	0.77812	0.22188	0.789131	0.210869	0.0137056	0.0137056	328	0.771341	0.228659	0.785551	0.214449	0.0100542	0.0100542	0			0.765128	0.234872	0.00871795	0.00871795	2848	792	3640	0.782418	0.217582	0.781788	0.218212	0.0149086	0.0149086
80% Grind 2	570	160	244	64	118	38	730	0.780822	0.219178					308	0.792208	0.207792					156	0.75641	0.24359
80% Grind 3	287	68	368	96	503	147	355	0.808451	0.191549					464	0.793103	0.206897					650	0.773846	0.226154
85% Grind 1	526	120	219	46	773	146	646	0.814241	0.185759	0.818065	0.181935	0.00382346	0.00382346	265	0.826415	0.173585	0.818109	0.181891	0.00877569	0.00877569	919	0.841132	0.158868	0.848183	0.151817	0.010491	0.010491	3980	791	4771	0.834207	0.165793	0.829376	0.170624	0.0169126	0.0169126
85% Grind 2			324	78	882	140								402	0.80597	0.19403					1022	0.863014	0.136986
85% Grind 3	383	83	457	99	416	79	466	0.821888	0.178112					556	0.821942	0.178058					495	0.840404	0.159596
90% Grind 1	245	39	96	10	563	59	284	0.862676	0.137324	0.877425	0.122575	0.0128573	0.0128573	106	0.90566	0.0943396	0.881216	0.118784	0.0200939	0.0200939	622	0.905145	0.0948553	0.887894	0.112106	0.0121989	0.0121989	4346	590	4936	0.88047	0.11953	0.882178	0.117822	0.0160632	0.0160632
90% Grind 2	388	46	525	88	744	102	434	0.894009	0.105991					613	0.856444	0.143556					846	0.879433	0.120567
90% Grind 3	556	79	640	86	589	81	635	0.875591	0.124409					726	0.881543	0.118457					670	0.879104	0.120896
95% Grind 1	1040	74	652	48	659	49	1114	0.933573	0.0664273	0.931679	0.0683208	0.00164346	0.00164346	700	0.931429	0.0685714	0.942029	0.057971	0.00937491	0.00937491	708	0.930791	0.069209	0.934671	0.0653293	0.0132408	0.0132408	5868	413	6281	0.934246	0.0657539	0.936126	0.0638737	0.0103706	0.0103706
95% Grind 2	1069	81	271	13	481	24	1150	0.929565	0.0704348					284	0.954225	0.0457746					505	0.952475	0.0475248
95% Grind 3	780	57	521	33	395	34	837	0.9319	0.0681004					554	0.940433	0.0595668					429	0.920746	0.0792541
